# Supplementary material for: Advances in Understanding Fusarium graminearum: Genes Involved in the Regulation of Sexual Development, Pathogenesis, and Deoxynivalenol Biosynthesis
Source: MDPI journal article supplement (doi:10.3390/genes15040475), 2024-04-09
Supplement: s1 [file s1]

**Table S2. Genes involved in DON production**

|                                  | Phenotypes of deletion mutants      | Genes                     | Proteins                                                |
|----------------------------------|-------------------------------------|---------------------------|---------------------------------------------------------|
|                                  |                                     |                           |                                                         |
| Genes involved in DON production | Decreased DON production            | <i>CPK1</i>               | Catalytic subunits of cyclic AMP (camp)-dependent (PKA) |
|                                  |                                     | <i>FgCAP1</i>             | Adenylate-binding protein                               |
|                                  |                                     | <i>FgBCK1</i>             | Protein kinase                                          |
|                                  |                                     | <i>FgMKK1</i>             |                                                         |
|                                  |                                     | <i>FgMGV1</i>             | MAPK                                                    |
|                                  |                                     | <i>FgSTE11-STE7-GPMK1</i> | MAPK                                                    |
|                                  |                                     | <i>FgHOG1</i>             | MAPK                                                    |
|                                  |                                     | <i>FgSHO1</i>             | Transmembrane protein                                   |
|                                  |                                     | <i>FgSTE50</i>            | Transcription factor                                    |
|                                  |                                     | <i>FgOS1</i>              | Response regulators                                     |
|                                  |                                     | <i>FgRRG1</i>             | Response regulators                                     |
|                                  |                                     | <i>FgATF1</i>             | Response factor                                         |
|                                  |                                     | <i>FgSTUA</i>             | Transcription factor                                    |
|                                  |                                     | <i>FgPEX13, FgPEX14</i>   | Docking machinery components                            |
|                                  |                                     | <i>FgPEX33</i>            | Filamentous fungal specific peroxin                     |
|                                  |                                     | <i>HEP1</i>               | Heterochromatin protein                                 |
|                                  |                                     | <i>KMT6</i>               | Histone acetyltransferases                              |
|                                  |                                     | <i>FgGCN5</i>             |                                                         |
|                                  |                                     | <i>ELP3</i>               |                                                         |
|                                  |                                     | <i>FgSAS3</i>             | Inhibitor of Growth (ING) proteins                      |
|                                  |                                     | <i>FNG1 and FNG3</i>      |                                                         |
|                                  |                                     | <i>FgAREA</i>             | Master regulator of nitrogen assimilation               |
|                                  |                                     | <i>FgSKN7</i>             | Transcription factor                                    |
|                                  |                                     | <i>FgSPE3</i>             | Involved in spermidine biosynthesis                     |
|                                  |                                     | <i>FgPRB1</i>             | Subtilisin-like protease                                |
|                                  | Increased DON production            | <i>PDE2</i>               | cAMP phosphodiesterase                                  |
|                                  |                                     | <i>FgPAC1</i>             | Transcription factor                                    |
|                                  |                                     | <i>PKR</i>                | Regulatory subunit of PKA                               |
|                                  | Defective in formation of toxisomes | <i>FgSUR2</i>             | Sphinganine C4-hydroxylase                              |
|                                  |                                     | <i>FgCDC25</i>            | Ras GTPase                                              |
|                                  |                                     | <i>FgMYO1</i>             | Class I myosin                                          |
|                                  |                                     | <i>FgCAPA and FgCAPB</i>  | Actin capping proteins                                  |
