# Supplementary material for: Advances in Understanding Fusarium graminearum: Genes Involved in the Regulation of Sexual Development, Pathogenesis, and Deoxynivalenol Biosynthesis
Source: MDPI journal article supplement (doi:10.3390/genes15040475), 2024-04-09
Supplement: s1 [file s1]

**Table S1. Genes involved in sexual reproduction**

|                                       | Phenotypes of deletion mutants    | Genes                            | Proteins                                  |
|---------------------------------------|-----------------------------------|----------------------------------|-------------------------------------------|
|                                       |                                   |                                  |                                           |
| Genes involved in sexual reproduction | No perithecium formation          | <i>GIP1</i>                      | Non-pheromone G protein-coupled receptor  |
|                                       |                                   | <i>GPA1</i>                      | Heterotrimeric G proteins                 |
|                                       |                                   | <i>FgFLBA</i>                    | Regulators of G protein signaling         |
|                                       |                                   | <i>MGV1</i>                      | MAPK                                      |
|                                       |                                   | <i>GPMK1</i>                     |                                           |
|                                       |                                   | <i>HOG1</i>                      |                                           |
|                                       |                                   | <i>FgSTE12</i>                   | Transcription factors                     |
|                                       |                                   | <i>FgMCM1</i>                    |                                           |
|                                       |                                   | <i>RAS2</i>                      | GTPase                                    |
|                                       |                                   | <i>PKR</i>                       | cAMP-PKA                                  |
|                                       |                                   | <i>FGK3</i>                      | Glycogen synthase kinase                  |
|                                       |                                   | <i>FgVELB</i>                    | Velvet protein complex                    |
|                                       |                                   | <i>FgEPS1</i>                    | Protein disulfide isomerase               |
|                                       |                                   | <i>FgAP1<math>\sigma</math></i>  | AP1 complex                               |
|                                       |                                   | <i>FgDBR1</i>                    | RNA lariat debranching enzyme             |
|                                       |                                   | <i>Fgporin</i>                   | Mitochondrial porin                       |
|                                       |                                   | <i>FgERV14</i>                   | Endoplasmic reticulum (ER) cargo receptor |
|                                       |                                   | <i>FgBEM1</i>                    | Phox homology domain-containing proteins  |
|                                       |                                   | <i>SGH1</i>                      | Serine/arginine (SR)-like protein         |
|                                       |                                   | <i>FgExosc1</i>                  | Components of the RNA exosome complex     |
|                                       | Reduced production of perithecia  | <i>MES1</i>                      | Implicated in cell-surface organization   |
|                                       |                                   | <i>FgSFL1</i>                    | Transcription factors                     |
|                                       |                                   | <i>FgCAPA</i> and <i>FgCAPB</i>  | Actin capping proteins                    |
|                                       |                                   | <i>GzSNF1</i>                    | Sucrose nonfermenting 1 protein kinase    |
|                                       | Delayed development of perithecia | <i>FgMET3</i> and <i>FgMET14</i> | Synthesis of cysteine and methionine      |
|                                       |                                   | <i>FgATF1</i>                    | Transcription factors                     |
|                                       | Defective in ascospore formation  | <i>GIA1</i>                      | Non-pheromone G protein-coupled receptor  |
|                                       |                                   | <i>FgSWI6</i>                    | Transcription factor                      |
|                                       |                                   | <i>FGP1</i>                      |                                           |
|                                       |                                   | <i>FgATF1</i>                    |                                           |
|                                       |                                   | <i>CPK1</i>                      | Catalytic subunit of PKA                  |
|                                       |                                   | <i>FgExoscA</i>                  | Components of the RNA exosome complex     |

|                                   |                                                                                                           |                                           |
|-----------------------------------|-----------------------------------------------------------------------------------------------------------|-------------------------------------------|
| Defective in ascospore<br>release | <i>FgDBF2</i> ( <i>Fg08635</i> )                                                                          |                                           |
|                                   | <i>FgSWE1</i> ( <i>Fg10228</i> )                                                                          | Protein kinase                            |
|                                   | <i>Fg08468</i> , <i>Fg07344</i> ,<br><i>Fg06878</i> and <i>Fg10095</i>                                    |                                           |
|                                   | <i>FgKIN1</i>                                                                                             |                                           |
|                                   | <i>FgCSN12</i>                                                                                            | Subunit of cop9 signalosome               |
|                                   | <i>FgBUD14</i>                                                                                            | Homology to yeast bud14                   |
|                                   | <i>GzSNF1</i>                                                                                             | Sucrose nonfermenting 1<br>protein kinase |
|                                   | <i>ZIF1</i>                                                                                               | B-zip transcription factor                |
|                                   | <i>FgLEU1</i>                                                                                             | Isopropylmalate isomerase                 |
|                                   | <i>Fg01506</i> , <i>Fg13318</i> ,<br><i>Fg08906</i> , <i>Fg01842</i> ,<br><i>Fg06957</i> , <i>Fg10095</i> | Protein kinase                            |
|                                   | <i>CCH1</i>                                                                                               | Calcium ion channel gene                  |
|                                   | <i>FgSRP1</i>                                                                                             | SR (serine/arginine-rich)<br>protein      |
|                                   | <i>FgATF1</i>                                                                                             | Stress-related transcription<br>factor    |
|                                   | <i>FgSP1</i>                                                                                              | Transporter                               |
|                                   | <i>GEA1</i>                                                                                               |                                           |
|                                   | <i>ROA</i>                                                                                                |                                           |
